# Supplementary material for: Automatic Detoxification Medicine Delivery by Thermo-Sensitive Poly(ethylene glycol)-Based Nanogels
Source: MDPI journal article supplement (doi:10.3390/polym14050892), 2022-02-24
Supplement: s1 [file s1]

# Automatic Detoxification Medicine Delivery by Thermo-Sensitive Poly(ethylene glycol)-Based Nanogels

Ting Fu <sup>1</sup>, Jing Shen <sup>1,\*</sup>, Yuting Meng <sup>1</sup>, Jun Wang <sup>1</sup>, Siping Wang <sup>2</sup>, Yuhui Zhang <sup>1</sup>, Tongwen Wang <sup>1</sup> and Xufeng Zhang <sup>1,\*</sup>

<sup>1</sup> College of Chemistry and Chemical Engineering, Yunnan Normal University, Kunming 650500, China; gracefuting@126.com (T.F.); m18468288406@163.com (Y.M.); 4478@ynnu.edu.cn (J.W.); zyh\_12342022@163.com (Y.Z.); wtongw@126.com (T.W.)  
<sup>2</sup> Institute of Education, China Democratic League (Yunnan), Kunming 650228, China; sipingwang18@163.com  
\* Correspondence: shenjing@ynnu.edu.cn (J.S.); xfzhang@ynnu.edu.cn (X.Z.)

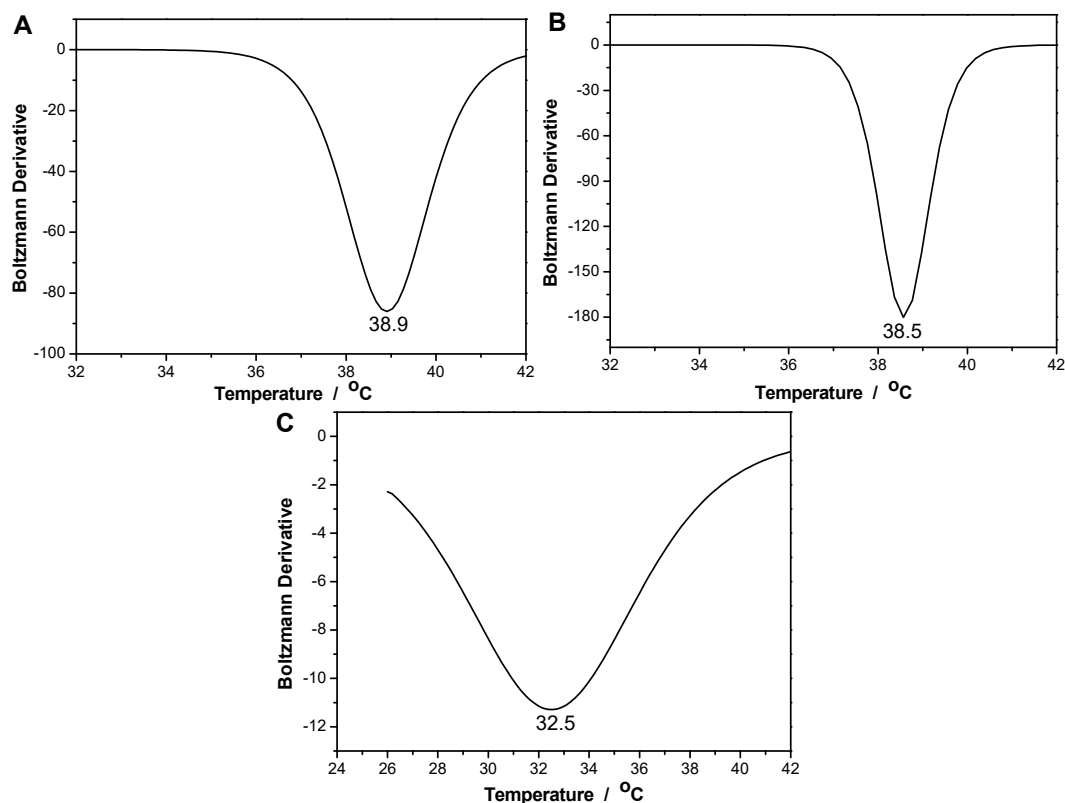

**Figure S1.** Boltzmann fitting-differential curves depended on temperature- $R_h$  values of (A) PS@P(MEO<sub>2</sub>MA-co-MEO<sub>5</sub>MA)-1, (B) PS@P(MEO<sub>2</sub>MA-co-MEO<sub>5</sub>MA)-2, and (C) PS@P(MEO<sub>2</sub>MA-co-MEO<sub>5</sub>MA)-3 nanogels prepared with same  $n(\text{MEO}_2\text{MA})/n(\text{MEO}_5\text{MA})$  feeding molar ratio of 1:3 but different initial monomer (MEO<sub>2</sub>MA and MEO<sub>5</sub>MA) amounts of shell in 100 mL of 0.227 g L<sup>-1</sup> PS dispersion.

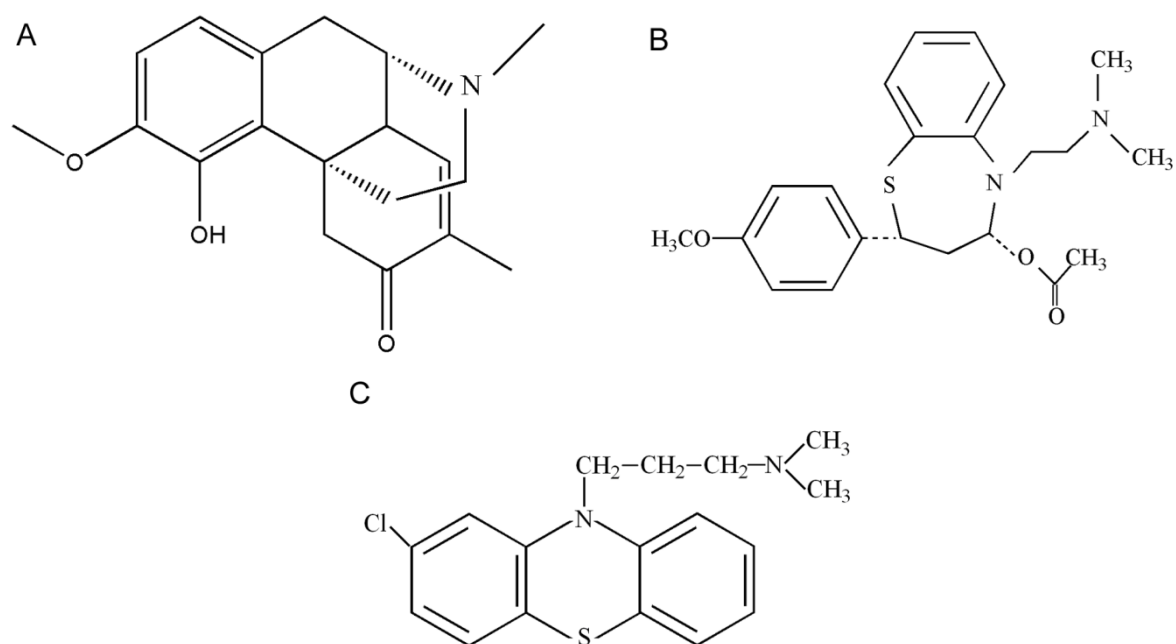

**Figure S2.** Chemical structures of (A) sinomenine, (B) diltiazem and (C) chlorpromazine.
